# Supplementary material for: Litter thickness limits the seed germination and seedling growth of Rhododendron plants
Source: PeerJ. 2026 Feb 5;14:e20756. doi: 10.7717/peerj.20756 (PMC12883157; doi:10.7717/peerj.20756)
Supplement: Supplemental Information 1 [file peerj-14-20756-s001.xlsx]

## Sheet: Data 1
Seed germination data under litter allelochemical treatment
		8	9	10	11	12	13	14	15	16	17	18	19
CK	R. decorum1	3	8	14	20	20	22	22	22	22	22	22	22
CK	R. decorum2	3	6	9	14	17	17	18	19	19	19	19	19
CK	R. decorum3	2	5	9	13	15	15	15	20	20	20	20	20
CK	R. decorum4	3	6	12	15	18	20	22	22	22	22	22	22
H1	R. decorum1	3	7	18	21	27	27	28	30	30	30	30	30
H1	R. decorum2	3	11	18	22	23	24	24	25	26	26	26	26
H1	R. decorum3	2	5	18	20	22	23	23	25	25	25	25	25
H1	R. decorum4	4	10	19	20	23	24	24	24	24	24	24	24
H2	R. decorum1	3	8	15	18	20	21	22	22	23	23	23	23
H2	R. decorum2	5	7	16	18	20	21	23	23	23	23	23	23
H2	R. decorum3	2	5	10	12	15	16	18	20	20	22	22	22
H2	R. decorum4		6	15	17	19	20	21	21	21	21	21	21
H3	R. decorum1		3	10	12	16	19	19	20	20	20	20	20
H3	R. decorum2	3	8	13	14	17	17	17	20	20	20	20	20
H3	R. decorum3	2	4	13	17	18	18	18	18	19	19	19	19
H3	R. decorum4	1	3	10	12	14	14	14	14	18	18	18	18
H4	R. decorum1	1	3	8	12	14	15	15	16	17	17	17	17
H4	R. decorum2	4	4	11	11	12	13	13	13	14	14	14	14
H4	R. decorum3	1	2	9	10	11	12	12	12	13	13	13	13
H4	R. decorum4	2	3	9	10	11	11	11	11	12	12	12	12
L1	R. decorum3	2	3	6	11	16	16	16	19	20	21	21	21
L1	R. decorum2	2	3	5		8	14	14	16	20	21	21	21
L1	R. decorum1			3	5	9	10	13	15	15	20	20	20
L1	R. decorum4		3	6	8	15	15	18	18	19	19	19	19
L2	R. decorum2	5	8	11	12	16	17	17	18	18	18	18	18
L2	R. decorum1	2	3	4	6	10	13	14	16	17	17	17	17
L2	R. decorum2	3	3	4	11	12	12	14	16	16	17	17	17
L2	R. decorum3	3	4	5	9	10	11	14	14	15	17	17	17
L3	R. decorum3	1	3	7	10	13	14	15	15	16	16	16	16
L3	R. decorum3	3	5	8	8	11	13	13	14	15	15	15	15
L3	R. decorum1			1	5	8	11	11	13	15	15	15	15
L3	R. decorum4	5	9	10	11	12	12	13	13	13	13	13	13
L4	R. decorum4	1	1	1	3	5	6	8	8	12	12	12	12
L4	R. decorum1	1	2	2	3	7	8	8	10	10	10	10	10
L4	R. decorum2	1	1	2	3	4	7	7	7	9	9	9	9
L4	R. decorum4		1	3	5	6	6	6	8	8	9	9	9
S1	R. decorum1	1	1	8	10	12	14	18	20	22	24	24	24
S1	R. decorum2			5	10	13	17	18	19	20	23	23	23
S1	R. decorum3	5	6	10	11	15	19	19	23	25	26	26	26
S1	R. decorum4	3	7	11	12	14	15	18	19	20	24	24	24
S2	R. decorum1	3	6	12	15	18	18	21	21	21	23	23	23
S2	R. decorum2	2	4	14	17	19	21	21	21	21	22	22	22
S2	R. decorum3	2	5	16	18	19	20	21	21	22	24	24	24
S2	R. decorum4	1	2	8	13	17	19	20	20	21	22	22	22
S3	R. decorum1	2	3	13	17	17	18	18	19	19	21	21	21
S3	R. decorum2	1	1	10	14	15	15	16	17	18	18	18	20
S3	R. decorum3	4	4	15	18	20	20	20	21	21	21	21	21
S3	R. decorum4	1	3	14	16	18	19	19	19	20	20	20	20
S4	R. decorum1	3	4	5	8	10	12	12	14	15	18	18	18
S4	R. decorum2		2	8	9	12	12	13	13	13	13	13	15
S4	R. decorum3	2	3	5	8	13	13	13	14	15	15	15	15
S4	R. decorum4		2	10	12	18	19	19	19	19	19	19	19
CK	R. irroratum1	4	8	11	17	20	23	24	28	28	31	31	31
CK	R. irroratum2	7	16	21	26	30	31	31	32	32	32	32	32
CK	R. irroratum3	7	12	25	26	31	31	32	33	35	36	36	36
CK	R. irroratum4	7	9	15	23	27	29	31	32	32	32	32	32
H1	R. irroratum1	1	6	23	27	31	33	35	36	36	36	36	36
H1	R. irroratum2	5	13	26	28	33	35	35	36	36	36	36	36
H1	R. irroratum3	5	9	24	27	31	32	33	35	36	36	36	36
H1	R. irroratum4		4	17	23	25	30	34	34	34	34	34	34
H2	R. irroratum1	4	8	19	28	29	31	33	33	33	33	33	33
H2	R. irroratum2	8	10	20	26	29	30	31	32	32	32	32	32
H2	R. irroratum3	7	10	21	27	28	28	28	31	32	32	32	32
H2	R. irroratum4	8	14	21	25	29	30	30	30	30	30	30	30
H3	R. irroratum1	4	10	16	20	23	26	29	30	30	30	30	30
H3	R. irroratum2	7	11	20	23	26	26	27	28	29	29	29	29
H3	R. irroratum3	3	8	14	21	25	29	29	29	29	29	29	29
H3	R. irroratum4	2	6	14	20	20	26	26	28	28	28	28	28
H4	R. irroratum1	4	6	16	18	21	23	23	27	27	27	27	27
H4	R. irroratum2	2	8	16	18	24	26	26	26	26	26	26	26
H4	R. irroratum3	1	3	8	8	11	15	16	18	19	19	19	19
H4	R. irroratum4	1	4	11	11	14	14	17	17	17	17	17	17
L1	R. irroratum1	1	3	9	16	18	20	28	30	32	32	32	32
L1	R. irroratum2	5	12	17	23	32	32	35	36	38	38	38	38
L1	R. irroratum3	4	10	11	22	30	32	34	35	37	37	37	37
L1	R. irroratum4	2	9	11	17	21	22	23	25	28	32	32	32
L2	R. irroratum1	3	7	12	17	23	25	25	26	28	29	29	29
L2	R. irroratum2	7	12	16	20	23	25	27	27	28	28	28	28
L2	R. irroratum3	4	8	10	16	18	20	21	22	23	29	29	29
L2	R. irroratum4	3	7	11	19	22	23	26	29	30	30	30	30
L3	R. irroratum1	5	9	12	14	16	16	16	18	19	26	26	26
L3	R. irroratum2	6	13	13	26	29	31	34	35	36	30	30	30
L3	R. irroratum3	1	10	10	22	29	32	32	33	34	29	29	29
L3	R. irroratum4	1	6	7	9	15	18	19	21	23	28	28	28
L4	R. irroratum1		1	7	13	15	16	16	16	18	18	18	18
L4	R. irroratum2	2	6	8	20	23	26	28	28	28	28	28	28
L4	R. irroratum3		3	3	9	12	14	18	21	22	22	22	22
L4	R. irroratum4	1	5	8	17	18	24	24	27	29	29	29	29
S1	R. irroratum1	2	4	15	19	21	27	21	32	33	33	33	33
S1	R. irroratum2	6	8	16	22	25	28	29	30	32	34	34	34
S1	R. irroratum3	3	8	21	24	27	28	29	30	32	33	33	33
S1	R. irroratum4	2	5	19	22	27	31	31	33	33	33	33	33
S2	R. irroratum1	5	6	19	23	26	30	32	33	34	34	34	34
S2	R. irroratum2		2	14	14	18	18	23	28	29	30	30	30
S2	R. irroratum3	3	4	21	26	27	29	32	33	33	33	33	33
S2	R. irroratum4	5	9	18	20	25	28	30	31	31	32	32	32
S3	R. irroratum1	4	7	14	18	20	22	23	25	28	30	30	30
S3	R. irroratum2	4	7	18	22	28	29	29	30	31	31	31	31
S3	R. irroratum3		3	13	17	21	22	26	27	28	28	28	28
S3	R. irroratum4	1	1	13	14	16	19	20	23	25	30	30	30
S4	R. irroratum1	3	6	19	21	25	28	30	31	31	31	31	31
S4	R. irroratum2	5	7	21	21	21	22	23	24	24	26	26	26
S4	R. irroratum3	4	6	18	22	25	28	31	31	32	32	32	32
S4	R. irroratum4	4	6	11	13	16	21	24	27	27	27	27	27
CK	R. agastum1	1	3	4	6	8	12	16	18	19	20	20	20
CK	R. agastum2	1	4	8	10	16	19	22	24	24	24	24	24
CK	R. agastum3	2	6	12	19	19	20	20	20	21	23	23	23
CK	R. agastum4	4	6	10	15	15	16	17	18	18	20	20	20
H1	R. agastum1	2	6	11	16	20	25	26	26	26	26	26	26
H1	R. agastum2	1	5	10	14	18	22	23	24	25	25	25	25
H1	R. agastum3	2	5	13	16	21	25	26	28	28	28	28	28
H1	R. agastum4		1	8	11	15	17	18	20	22	22	22	22
H2	R. agastum1	1	2	8	11	12	15	16	18	19	19	19	19
H2	R. agastum2	4	5	11	14	18	20	22	22	23	23	23	21
H2	R. agastum3	1	2	8	8	13	14	15	15	16	16	16	18
H2	R. agastum4	1	3	7	8	12	14	16	18	20	20	20	20
H3	R. agastum1	4	6	15	16	16	17	18	20	20	21	21	21
H3	R. agastum2		1	4	5	10	14	18	18	18	19	19	19
H3	R. agastum3	2	4	8	10	14	17	18	19	20	20	20	20
H3	R. agastum4				3	4	9	11	15	16	17	17	17
H4	R. agastum1	1	1	5	7	8	10	15	15	15	15	15	15
H4	R. agastum2	2	2	6	8	10	13	16	17	19	19	19	19
H4	R. agastum3	3	3	7	10	11	13	16	17	19	19	19	19
H4	R. agastum4		1	4	8	12	12	15	17	20	20	20	20
L1	R. agastum1	5	5	7	10	13	16	17	19	19	20	20	20
L1	R. agastum2	2	3	5	10	12	13	15	18	19	22	22	22
L1	R. agastum3	1	1	2	4	6	13	14	18	23	24	24	24
L1	R. agastum4		1	3	7	11	11	13	19	22	23	23	23
L2	R. agastum1	1	4	6	6	8	8	10	16	20	21	21	21
L2	R. agastum2	2	4	5	7	10	11	12	15	20	22	22	22
L2	R. agastum3	1	1	2	5	6	12	12	16	18	22	22	22
L2	R. agastum4	2	3	3	4	8	9	11	14	19	21	21	21
L3	R. agastum1		2	3	4	7	10	10	15	20	21	21	21
L3	R. agastum2	1	2	2	4	7	10	11	16	16	20	20	20
L3	R. agastum3	1	2	4	6	8	11	11	15	18	22	22	22
L3	R. agastum4	1	1	2	8	10	12	12	16	20	22	22	22
L4	R. agastum1		1	3	7	11	13	13	15	18	20	20	20
L4	R. agastum2		2	2	7	7	9	10	13	15	16	16	16
L4	R. agastum3			2	4	7	11	13	15	21	21	21	21
L4	R. agastum4		2	3	4	6	8	10	15	17	20	20	20
S1	R. agastum1	2	4	6	8	12	14	19	20	22	24	24	24
S1	R. agastum2	3	4	5	6	17	18	20	24	24	24	24	24
S1	R. agastum3	4	6	13	15	16	17	17	20	23	25	25	25
S1	R. agastum4		3	9	11	12	16	19	21	21	21	21	21
S2	R. agastum1	2	3	14	15	18	18	19	20	22	24	24	24
S2	R. agastum2	5	6	8	13	17	21	21	23	24	24	24	24
S2	R. agastum3	3	3	9	10	13	18	19	21	23	23	23	23
S2	R. agastum4	2	3	6	9	14	17	18	19	19	20	20	20
S3	R. agastum1	1	2	10	15	17	18	19	20	22	23	23	23
S3	R. agastum2	4	6	8	10	16	18	21	21	22	22	22	22
S3	R. agastum3	3	4	7	11	14	17	21	22	22	22	22	22
S3	R. agastum4	2	2	9	11	12	13	15	18	20	21	21	21
S4	R. agastum1			1	2	6	8	10	18	19	19	19	19
S4	R. agastum2	3	6	11	12	14	17	17	18	18	20	20	20
S4	R. agastum3	1	5	13	13	15	16	16	17	18	18	18	18
S4	R. agastum4	2	2	4	8	10	16	16	17	19	19	19	19
CK	R. delavayi1	6	9	15	21	27	28	30	30	30	30	30	30
CK	R. delavayi2	4	8	12	17	20	24	25	26	27	29	29	29
CK	R. delavayi3	4	7	10	16	23	26	27	28	28	28	28	28
CK	R. delavayi4	5	8	18	26	27	28	29	29	29	29	29	29
H1	R. delavayi1	1	2	11	16	22	25	25	26	28	30	30	30
H1	R. delavayi2			17	18	24	28	32	35	35	35	35	35
H1	R. delavayi3	1	3	16	18	27	31	31	32	32	32	32	32
H1	R. delavayi4		4	18	22	28	30	31	33	33	33	33	33
H2	R. delavayi1		1	8	13	17	24	25	28	31	31	31	31
H2	R. delavayi2	1	3	13	18	19	24	25	27	28	30	32	32
H2	R. delavayi3	2	3	16	19	19	23	25	26	30	30	30	30
H2	R. delavayi4		2	15	18	21	26	26	27	28	30	30	30
H3	R. delavayi1	1	2	10	15	19	21	26	28	30	32	32	32
H3	R. delavayi2			10	20	24	25	25	26	30	30	30	30
H3	R. delavayi3	1	2	9	11	15	17	22	25	25	28	28	28
H3	R. delavayi4		1	9	12	18	22	30	31	31	31	31	31
H4	R. delavayi1			11	16	16	19	23	23	24	24	24	24
H4	R. delavayi2	1	3	8	10	18	23	23	28	28	28	28	28
H4	R. delavayi3		5	11	16	18	22	24	25	26	26	26	26
H4	R. delavayi4	1	6	18	19	20	21	25	26	28	29	29	29
L1	R. delavayi1		2	3	5	9	11	12	12	15	18	18	18
L1	R. delavayi2				1	2	6	10	14	17	23	23	23
L1	R. delavayi3		1	2	3	6	8	10	14	17	19	19	19
L1	R. delavayi4			1	6	7	11	11	15	21	26	26	26
L2	R. delavayi1				1	1	1	3	7	12	13	13	13
L2	R. delavayi2		1	3	4	7	7	10	13	15	19	19	19
L2	R. delavayi3			2	2	3	7	8	13	18	23	23	23
L2	R. delavayi4		1	2	2	3	5	6	12	12	19	19	19
L3	R. delavayi1					2	4	4	4	8	11	11	11
L3	R. delavayi2					2	4	5	7	10	11	11	11
L3	R. delavayi3		2	3	4	8	10	13	19	21	22	22	22
L3	R. delavayi4		1	1	5	6	7	9	11	18	19	19	19
L4	R. delavayi1		1	2	4	4	7	8	12	15	15	15	15
L4	R. delavayi2			2	5	8	9	10	12	13	14	14	14
L4	R. delavayi3				1	3	3	6	7	8	11	11	11
L4	R. delavayi4		1	1	3	5	6	6	10	12	15	15	15
S1	R. delavayi1		3	12	17	21	23	25	28	28	28	28	28
S1	R. delavayi2		1	8	11	17	17	20	24	25	26	26	26
S1	R. delavayi3	1	4	8	12	17	20	23	27	27	27	27	27
S1	R. delavayi4			10	15	22	26	31	31	34	34	34	30
S2	R. delavayi1		2	11	15	19	22	22	27	27	27	27	27
S2	R. delavayi2	1	2	9	15	19	24	26	26	26	26	26	26
S2	R. delavayi3		4	11	14	24	29	31	32	32	32	32	29
S2	R. delavayi4	1	1	1	8	12	16	22	22	23	23	23	28
S3	R. delavayi1			8	12	18	19	22	22	23	23	23	23
S3	R. delavayi2		3	14	18	24	28	28	30	30	30	30	29
S3	R. delavayi3		3	12	16	17	22	26	28	28	28	28	28
S3	R. delavayi4			10	15	22	22	25	26	27	27	27	27
S4	R. delavayi1		3	7	10	16	17	19	21	21	21	21	21
S4	R. delavayi2	1	3	8	12	14	17	22	23	25	25	25	25
S4	R. delavayi3		2	11	13	19	21	24	25	25	25	25	25
S4	R. delavayi4								5

## Sheet: Data 2
Seed germination data under litter mechanical barrier treatment
treatment	Seedling number
	R. agastum	R. decorum	R. delavayi	R. irroratum
CK	10	9	5	9
CK	11	9	7	8
CK	9	10	6	12
CK	14	12	7	11
BL1	10	13	11	17
BL1	13	14	15	15
BL1	17	15	12	18
BL1	12	13	10	15
BL2	10	13	11	20
BL2	13	14	12	27
BL2	12	12	9	22
BL2	13	16	10	21
BL3	13	13	1	12
BL3	11	10	2	17
BL3	11	12	4	17
BL3	10	15	2	24
AL1	11	15	11	14
AL1	14	18	13	12
AL1	10	20	13	10
AL1	11	20	11	11
AL2	9	6	9	6
AL2	10	10	6	10
AL2	8	9	7	8
AL2	5	7	4	6
AL3	4	5	5	6
AL3	6	6	4	8
AL3	9	2	9	7
AL3	6	3	4	7
	Note : BL-seeds under ; aL - Seeds on
